# Supplementary material for: Toughened, self-healing and self-adhesive conductive gels with extraordinary temperature adaptability for dual-responsive sensors
Source: Royal Society of Chemistry journal article supplement (doi:10.1039/d2ta07961e), 2022-01-01
Supplement: d2ta07961e1.pdf [file d2ta07961e1.pdf]

## Supplementary Information

### Toughened, self-healing and self-adhesive conductive gels with extraordinary temperature adaptability for dual-responsive sensors

Enke Feng,<sup>\*,‡</sup> Xue Li,<sup>‡</sup> Xiaoqin Li, Mengzhen Zhang, Linan Cao, Ziqiang Wu,<sup>\*</sup> and Xinxian Ma

*College of Chemistry and Chemical Engineering, Ningxia Normal University, GuYuan 756000, China.*

<sup>‡</sup>These authors contributed equally to this work. They should thus be considered co-first authors.

<sup>\*</sup>Corresponding authors: NXSFEKF@126.com (E, Feng); Wuzqnd@163.com (Z, Wu).

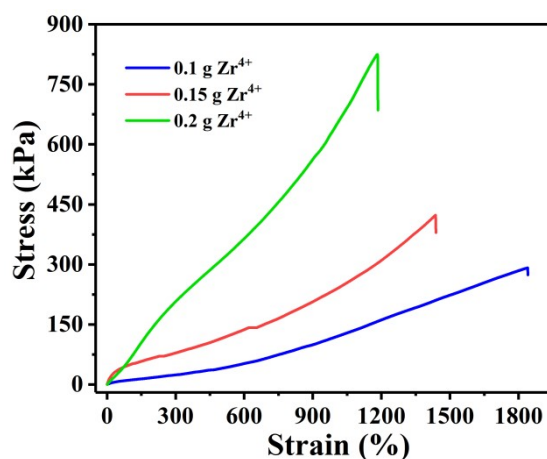

**Fig. S1.** The stress-strain curves of the PAA-Zr<sup>4+</sup>/Gly/IL gels with various Zr<sup>4+</sup> contents.

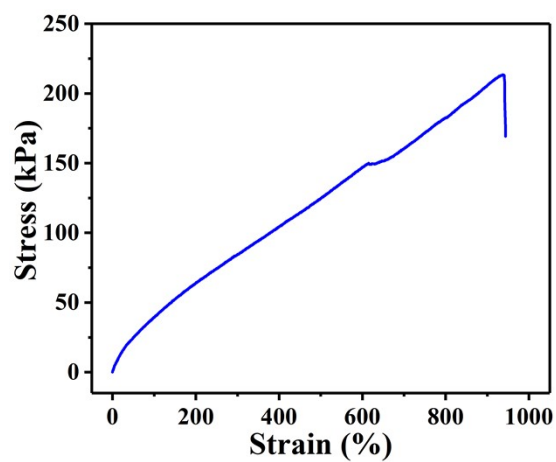

**Fig. S2.** The stress-strain curve of the PAA-Zr<sup>4+</sup>/Gly/IL gel with self-healing for 24 h (65% self-healing efficiency for strain and 50% self-healing efficiency for stress).

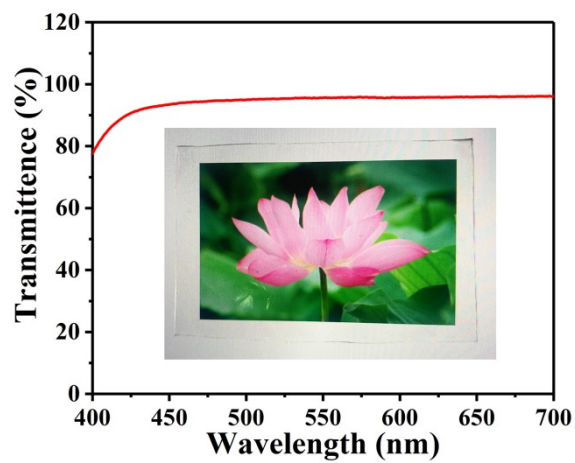

**Fig. S3.** The UV-vis transmittance spectra of the PAA-Zr<sup>4+</sup>/Gly/IL gel, and the insets showing the high transparency of the PAA-Zr<sup>4+</sup>/Gly/IL gel.

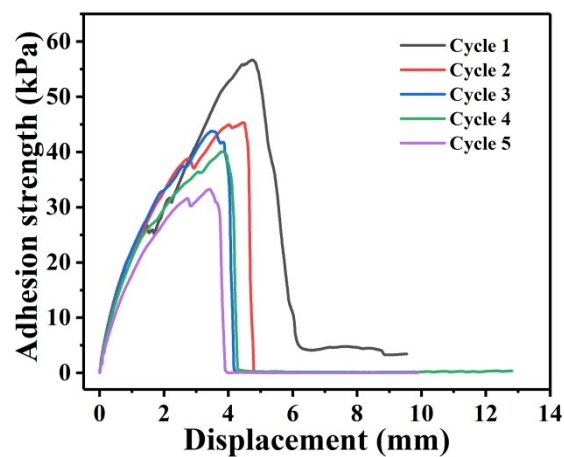

**Fig. S4.** The cyclic adhesion strength of the PAA-Zr<sup>4+</sup>/Gly/IL gel onto the copper substrate surface.

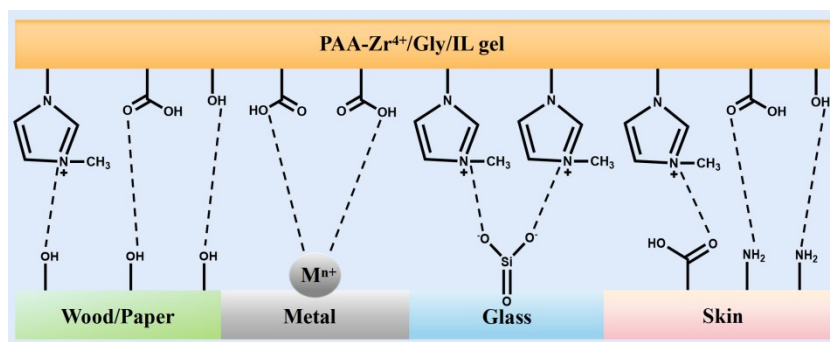

**Fig. S5.** The adhesive mechanism between the PAA-Zr<sup>4+</sup>/Gly/IL gel and various substrates.

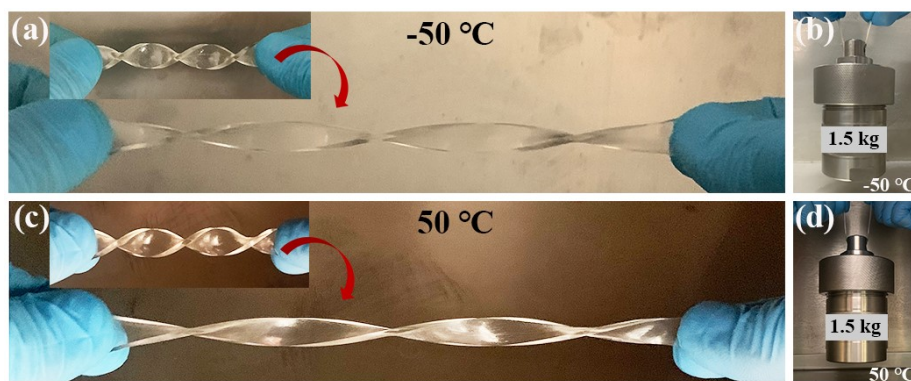

**Fig. S6.** (a), (b), (c) and (d) Photographs showing the excellent mechanical flexibility and toughness of the PAA-Zr<sup>4+</sup>/Gly/IL gel at -50 and 50 °C, respectively.

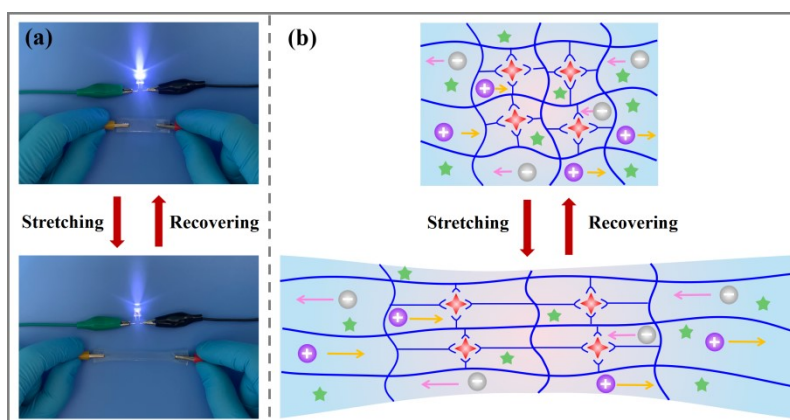

**Fig. S7.** (a) Comparisons of the luminance of LEDs by using the PAA-Zr<sup>4+</sup>/Gly/IL gel with various tensile strains as the connecting wire. (b) Schematic illustration of the changes of PAA-Zr<sup>4+</sup>/Gly/IL gel structure according to external stretching deformation.

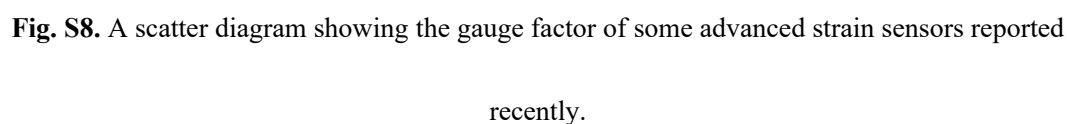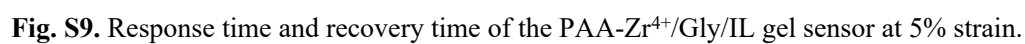

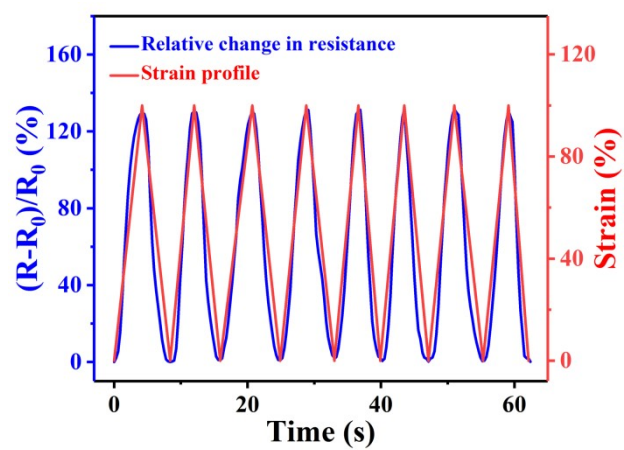

**Fig. S10.** Relative resistance changes of the PAA-Zr<sup>4+</sup>/Gly/IL gel sensor at 100% strain during periodic stretching and releasing.
